# Supplementary material for: Cesium Uptake by Rice Roots Largely Depends Upon a Single Gene, HAK1, Which Encodes a Potassium Transporter
Source: Oxford University Press journal article supplement (doi:10.1093/pcp/pcx094), 2017-07-06
Supplement: pcx094_Supplementary_Fig_S1.pdf [file pcx094_Supplementary_Fig_S1.pdf]

## Supplementary Data

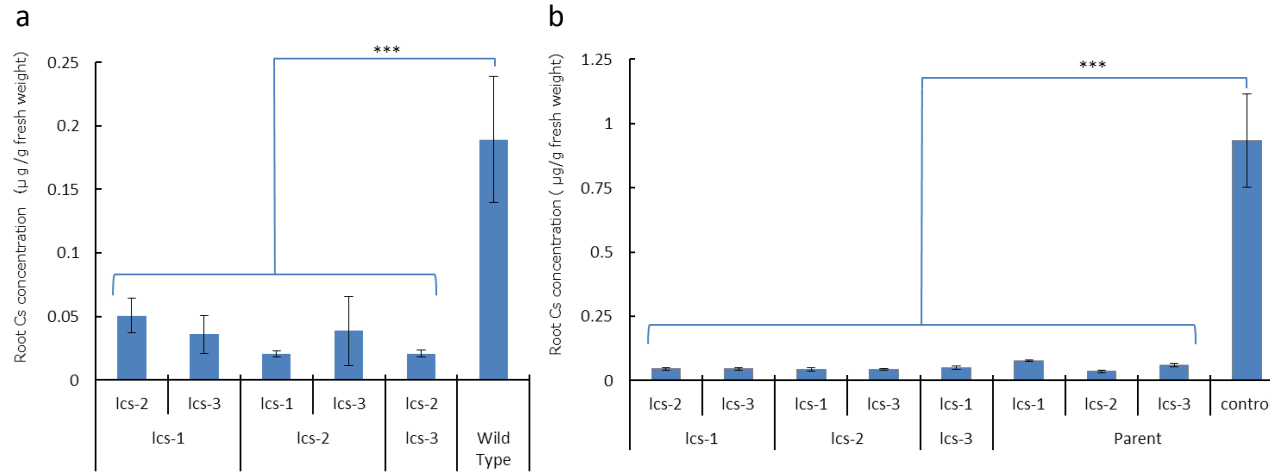

**Fig. S1. Allelism test revealing identical causative gene in all three mutants.**

**a**, Root Cs concentration in F<sub>1</sub>-generation seedlings after 2 days of growth in hydroponic solution ( $\times 0.5 K^+$  and 10 ppb Cs). Data are means  $\pm$  s.d. (*lcs-1*  $\times$  *lcs-2*;  $n=5$ , *lcs-1*  $\times$  *lcs-3*;  $n=7$ , *lcs-2*  $\times$  *lcs-1*;  $n=5$ , *lcs-2*  $\times$  *lcs-3*;  $n=6$ , *lcs-3*  $\times$  *lcs-2*;  $n=6$ ). **b**, Root Cs concentration in F<sub>2</sub>-generation seedlings (*lcs-1*  $\times$  *lcs-2*, *lcs-1*  $\times$  *lcs-3*, *lcs-2*  $\times$  *lcs-3*, *lcs-3*  $\times$  *lcs-1*;  $n=30$ , *lcs-2*  $\times$  *lcs-1*;  $n=20$ ) and parent generation seedlings (*lcs-1*;  $n=9$ , *lcs-2*;  $n=10$ , *lcs-3*;  $n=19$ , WT;  $n=20$ ). *lcs* mutants were compared with WT (Tukey's test).
