# Supplementary material for: Cesium Uptake by Rice Roots Largely Depends Upon a Single Gene, HAK1, Which Encodes a Potassium Transporter
Source: Oxford University Press journal article supplement (doi:10.1093/pcp/pcx094), 2017-07-06
Supplement: pcx094_Supplementary_Fig_S2.pdf [file pcx094_Supplementary_Fig_S2.pdf]

## Supplementary Data

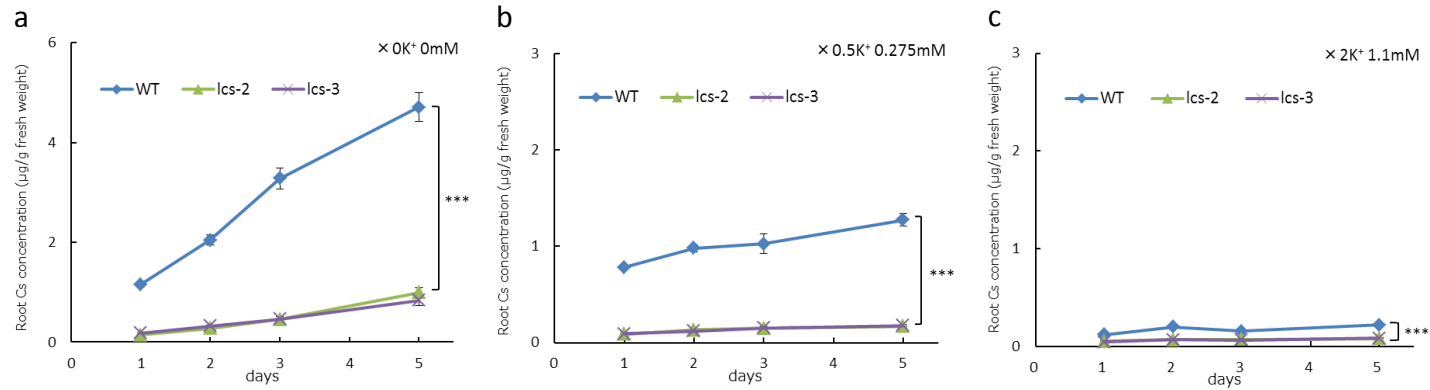

**Fig. S2. Caesium uptake into roots of *lcs* mutants and WT grown in hydroponic conditions.**

**a, b, c,** Root Cs concentration in 2-week-old seedlings cultivated in Kimura B solution containing 10 ppb  $^{133}\text{Cs}$  and  $\times 0\text{K}^+$  (**a**),  $\times 0.5\text{K}^+$  (**b**),  $\times 2\text{K}^+$  (**c**). Data are means  $\pm$  s.e. ( $n=3$ ). *lcs* mutants were compared with WT (Dunnett's test).
