# Supplementary material for: Cesium Uptake by Rice Roots Largely Depends Upon a Single Gene, HAK1, Which Encodes a Potassium Transporter
Source: Oxford University Press journal article supplement (doi:10.1093/pcp/pcx094), 2017-07-06
Supplement: pcx094_Supplementary_Fig_S5.pdf [file pcx094_Supplementary_Fig_S5.pdf]

# Supplementary Data

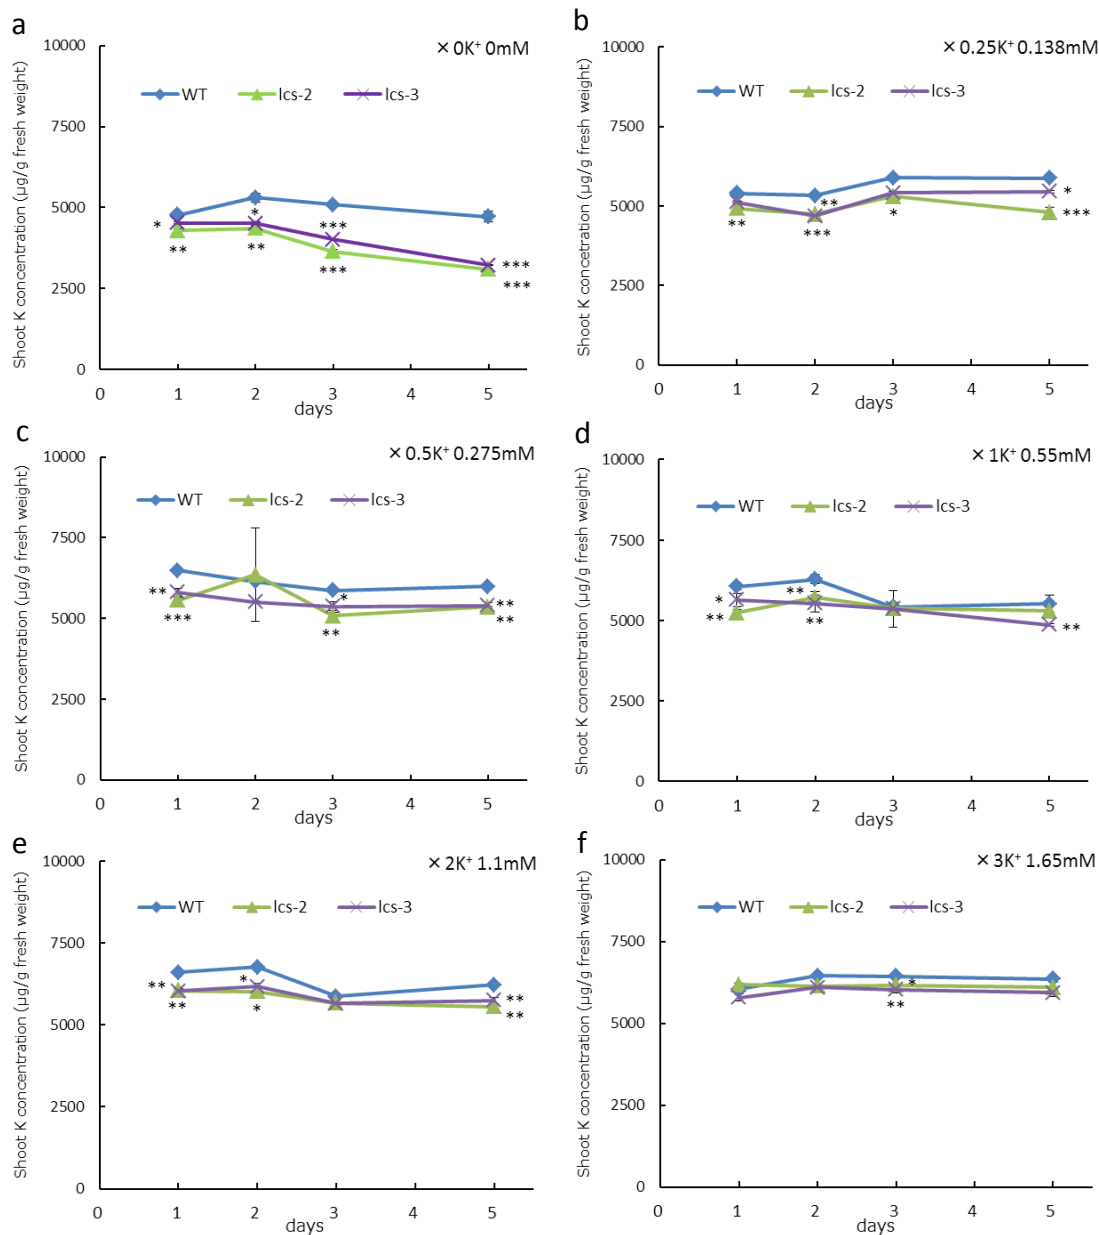

**Fig. S5. Potassium uptake into shoots of *lcs* mutants and WT grown in hydroponic conditions.**

**a–f**, Shoot K concentration in 2-week-old seedlings cultivated in Kimura B solution containing 10 ppb  $^{133}Cs$  and  $\times 0K^+$  (**a**),  $\times 0.25K^+$  (**b**),  $\times 0.5K^+$  (**c**),  $\times 1K^+$  (**d**),  $\times 2K^+$  (**e**),  $\times 3K^+$  (**f**). Data are means  $\pm$  s.e. ( $n=3$ ). *lcs* mutants were compared with WT (Dunnett's test).
