# Supplementary material for: Cesium Uptake by Rice Roots Largely Depends Upon a Single Gene, HAK1, Which Encodes a Potassium Transporter
Source: Oxford University Press journal article supplement (doi:10.1093/pcp/pcx094), 2017-07-06
Supplement: pcx094_Supplementary_Fig_S6.pdf [file pcx094_Supplementary_Fig_S6.pdf]

## Supplementary Data

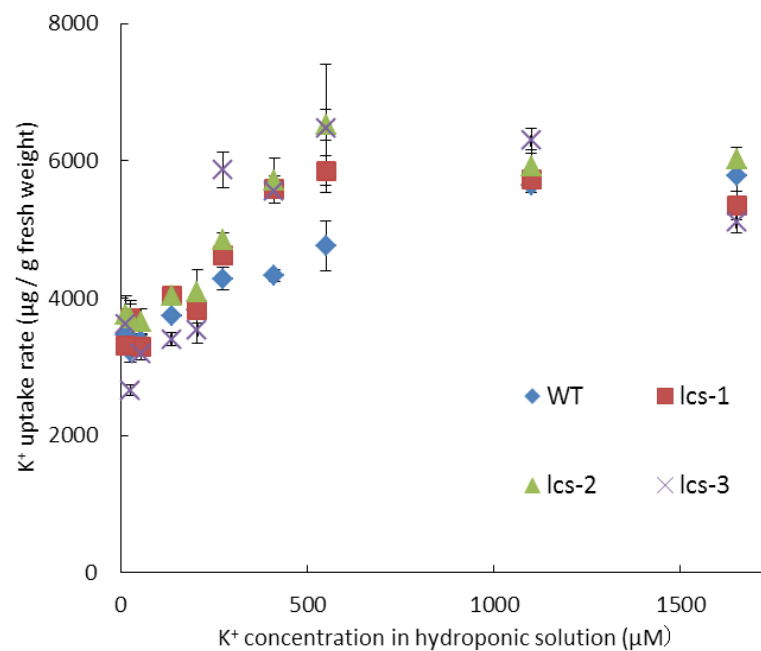

**Fig. S6. Potassium uptake by *oshak1* in different K<sup>+</sup> conditions.** Uptake rates of K in *oshak1* mutants and WT in solutions containing K<sup>+</sup> at various concentrations and 10 ppb <sup>133</sup>Cs. K uptake rate was calculated as follows: total K uptake ÷ fresh weight of roots (µg/g-day). Data are means ± s.e. (n=4).
