# Supplementary material for: Cesium Uptake by Rice Roots Largely Depends Upon a Single Gene, HAK1, Which Encodes a Potassium Transporter
Source: Oxford University Press journal article supplement (doi:10.1093/pcp/pcx094), 2017-07-06
Supplement: pcx094_Supplementary_Table_S1.pdf [file pcx094_Supplementary_Table_S1.pdf]

## Supplementary Data

| Soil Taxonomy | cultivation year | pH (H <sub>2</sub> O) | pH (KCl) | Total N | Total C | Exchangeable cations |     |      |     | Water-soluble cations |      |
|---------------|------------------|-----------------------|----------|---------|---------|----------------------|-----|------|-----|-----------------------|------|
|               |                  |                       |          |         |         | Cs                   | K   | Rb   | Mg  | Cs                    | K    |
| Fluvisol      | 2015             | 7.96                  | 6.82     | 0.33    | 3.51    | 0.040                | 336 | 48.7 | 480 | 0.55                  | 11.7 |

**Table S1. Results of soil chemical analysis.**

Total N and total C are expressed as %. Exchangeable and water-soluble cations are expressed as mg/kg soil except for water-soluble Cs (<sup>133</sup>Cs expressed as µg/kg soil).
