# Supplementary material for: Cesium Uptake by Rice Roots Largely Depends Upon a Single Gene, HAK1, Which Encodes a Potassium Transporter
Source: Oxford University Press journal article supplement (doi:10.1093/pcp/pcx094), 2017-07-06
Supplement: pcx094_Supplementary_Table_S2.pdf [file pcx094_Supplementary_Table_S2.pdf]

## Supplementary Data

| Hydroponic solution name   | Standard condition |                   |                  |                 |                  |                   |                 |                  |               |               |
|----------------------------|--------------------|-------------------|------------------|-----------------|------------------|-------------------|-----------------|------------------|---------------|---------------|
|                            | $\times 1K^+$      | $\times 0.025K^+$ | $\times 0.05K^+$ | $\times 0.1K^+$ | $\times 0.25K^+$ | $\times 0.375K^+$ | $\times 0.5K^+$ | $\times 0.75K^+$ | $\times 2K^+$ | $\times 3K^+$ |
| $K^+$ concentration (mM)   | 0.55               | 0.014             | 0.027            | 0.055           | 0.138            | 0.206             | 0.275           | 0.413            | 1.1           | 1.65          |
| <b>Macro elements (mM)</b> |                    |                   |                  |                 |                  |                   |                 |                  |               |               |
| $(NH_4)_2SO_4$             | 0.365              | 0.365             | 0.365            | 0.365           | 0.365            | 0.365             | 0.365           | 0.365            | 0.365         | 0.365         |
| $MgSO_4$                   | 0.547              | 0.547             | 0.547            | 0.547           | 0.547            | 0.547             | 0.547           | 0.547            | 0.547         | 0.547         |
| $Ca(NO_3)_2$               | 0.365              | 0.365             | 0.365            | 0.365           | 0.365            | 0.365             | 0.365           | 0.365            | 0.365         | 0.365         |
| Fe(III)-EDTA               | 0.05               | 0.05              | 0.05             | 0.05            | 0.05             | 0.05              | 0.05            | 0.05             | 0.05          | 0.05          |
| $KNO_3$                    | 0.183              | 0                 | 0                | 0               | 0                | 0                 | 0               | 0.183            | 0.183         | 0.183         |
| $K_2SO_4$                  | 0.091              | 0                 | 0                | 0               | 0                | 0                 | 0               | 0                | 0.091         | 0.091         |
| $KH_2PO_4$                 | 0.182              | 0                 | 0                | 0               | 0                | 0.182             | 0.182           | 0.182            | 0.182         | 0.182         |
| KCl                        | 0                  | 0.014             | 0.027            | 0.054           | 0.136            | 0.022             | 0.09            | 0.044            | 0.547         | 1.094         |
| $NH_4H_2PO_4$              | 0                  | 0.182             | 0.182            | 0.182           | 0.182            | 0                 | 0               | 0                | 0             | 0             |

**Table S2. Composition of hydroponic solutions.**
