# Supplementary material for: Cesium Uptake by Rice Roots Largely Depends Upon a Single Gene, HAK1, Which Encodes a Potassium Transporter
Source: Oxford University Press journal article supplement (doi:10.1093/pcp/pcx094), 2017-07-06
Supplement: pcx094_Supplementary_Table_S3.pdf [file pcx094_Supplementary_Table_S3.pdf]

## Supplementary Data

---

|                    |              |                         | Exchangeable cations |      |
|--------------------|--------------|-------------------------|----------------------|------|
|                    | sampling day | Total $^{137}\text{Cs}$ | $^{137}\text{Cs}$    | K    |
| Before cultivation | 2016/4/20    | 3740                    | 194.1                | 78.8 |
| After cultivation  | 2016/10/8    | 3590                    | -                    | 47.3 |

---

**Table S3. The analysis of  $^{137}\text{Cs}$  contaminated soil.** Total and exchangeable  $^{137}\text{Cs}$  was shown in Bq/kg soil. Exchangeable K was shown in mg/kg soil
