# Supplementary material for: Cesium Uptake by Rice Roots Largely Depends Upon a Single Gene, HAK1, Which Encodes a Potassium Transporter
Source: Oxford University Press journal article supplement (doi:10.1093/pcp/pcx094), 2017-07-06
Supplement: pcx094_Supplementary_Table_S4.pdf [file pcx094_Supplementary_Table_S4.pdf]

## Supplementary Data

---

|                        |                         |
|------------------------|-------------------------|
| 1 HAK1_5prime1_F       | CTCCAGCCGGCGAGAGAGA     |
| 2 HAK1_5prime1_R       | CTTGGGTCATGTTACACCCTA   |
| 3 OsHAK1_Exon_3R       | TCTGAGTCAAGTTTGGAGCTTTC |
| 4 OsHAK1_Exon_3F       | TGCTCTCTGCGGTGAGCGG     |
| 5 OsHAK1_Exon_7R       | CGTAGGCGTTGCCGATGCTG    |
| 6 OsHAK1_Exon_8F       | GGATCTGTGTGGTGACGACG    |
| 7 OsHAK1_Exon_8middleR | CTCCTGGATGAACATCTTGAGGC |

---

**Table S4. Primers used for sanger sequencing of *OsHAK1* cDNA.**
